# Supplementary material for: Association of Breastfeeding for the First Six Months of Life and Autism Spectrum Disorders: A National Multi-Center Study in China
Source: MDPI journal article supplement (doi:10.3390/nu14010045), 2021-12-23
Supplement: s1 [file s1]

## SUPPLEMENT

**Table S1** Overview of the studies about the association between breastfeeding and risk of ASD

**Table S2** Comparison of demographic characteristics of participants with or without the information of questionnaires

**Table S3** Demographic information and maternal risk factors during pregnancy between toddlers with and without ASD

**Table S4** Comparison of breastfeeding status under the first six months among toddlers with and without ASD

**Table S5** Prevalence of ASD associated with breastfeeding during the first six months among toddlers

**Table S6** The association between breastfeeding status under the first six months by using Firth's Bias-Reduced Logistic Regression

**Table S7** The associations between breastfeeding status under the first six months and ASD when restricting toddlers in full-term birth

**Table S8** The associations between breastfeeding status under the first six months and ASD when restricting mothers of toddlers without complications during pregnancy

**Table S9** The associations between breastfeeding status under the first six months and ASD when restricting mothers of toddlers without overweight or obesity before pregnancy.

**Table S1. Overview of the studies about the association between breastfeeding and risk of ASD.**

| Year         | Author                 | Country   | group             | Sample size     | Age        | Outcome definition                                                  |                      | Exposure definition                                                                            | OR/ RR (95%CI)                                                                             |
|--------------|------------------------|-----------|-------------------|-----------------|------------|---------------------------------------------------------------------|----------------------|------------------------------------------------------------------------------------------------|--------------------------------------------------------------------------------------------|
|              |                        |           |                   |                 |            | Diagnostic procedure                                                | Diagnostic criterion |                                                                                                |                                                                                            |
| Case-control |                        |           |                   |                 |            |                                                                     |                      |                                                                                                |                                                                                            |
| 2018         | Bittker <sup>[1]</sup> | USA       | ASD Controls      | 1,001<br>514    | 3-12 years | Parent-report                                                       | NA                   | Breastfeeding (months)                                                                         | 0.948 (0.932-0.965)                                                                        |
| 2018         | Manohar <sup>[2]</sup> | India     | ASD TD siblings   | 30<br>30        | 2-6 years  | Standard assessment (CARS)                                          | DSM-5                | Compares exclusive breastfeeding up to 6 months with no exclusive breastfeeding up to 6 months | 0.167 (0.025–0.65)                                                                         |
| 2016         | Say <sup>[3]</sup>     | Turkey    | ASD ADHD Controls | 98<br>96<br>79  | 3-18 years | Diagnostic procedure by an expert child and adolescent psychiatrist | DSM-IV               | Compares never breastfeeding with 1 month, 3 months, 6 months, 12 months and ≥ 24 months       | 0.23 (0.02–2.06), 0.22 (0.02–1.92), 0.2 (0.02–1.76), 0.21 (0.02–1.98) and 0.53 (0.04–6.65) |
| 2014         | Field <sup>[4]</sup>   | USA       | ASD ADHD Controls | 31<br>81<br>612 | NA         | Diagnostic procedure by an expert child and adolescent psychiatrist | DSM-IV-TR            | Compares benefits of breastfeeding < 4 months and ≥ 4 months                                   | Unreported                                                                                 |
| 2014         | George <sup>[5]</sup>  | India     | ASD Controls      | 143<br>200      | 2-6 years  | Standard assessment (CARS)                                          | NA                   | Compares breastfeeding duration nil / < 6 month with ≥ 6 months                                | 3.4 (1.28-8.99)                                                                            |
| 2014         | Brown <sup>[6]</sup>   | Australia | ASD TD siblings   | 19<br>23        | NA         | Administrative databases                                            | NA                   | Compared first hour feeding with late initiation of breastfeeding                              | 0.26(0.07-0.89)                                                                            |
| 2014         | Shafai <sup>[7]</sup>  | USA       | PDD Contorls      | 60<br>85        | ND         | Parent-report                                                       | NA                   | Assess benefits of breastfeeding < 2 months, 2–4 months, 4–6 months, 6–9                       | Unreported                                                                                 |

|      |                         |           |                              |            |                                |                                                                                    |           |                                                                                                                                                                                                                                                                                                                                                                                                                                                                                                                                                                                                                                                                                                                                                                                                 |  |
|------|-------------------------|-----------|------------------------------|------------|--------------------------------|------------------------------------------------------------------------------------|-----------|-------------------------------------------------------------------------------------------------------------------------------------------------------------------------------------------------------------------------------------------------------------------------------------------------------------------------------------------------------------------------------------------------------------------------------------------------------------------------------------------------------------------------------------------------------------------------------------------------------------------------------------------------------------------------------------------------------------------------------------------------------------------------------------------------|--|
|      |                         |           |                              |            |                                |                                                                                    |           | months, 9–12<br>months, 12–15<br>months, 15–18<br>months, 18–24<br>months, and ≥ 24<br>months<br>Compare late<br>initiation of breast-<br>feeding with early<br>initiation of<br>breastfeeding<br>Compared non-<br>intake of colostrum<br>with intake of<br>colostrum<br>Compared duration<br>of exclusive<br>breastfeeding with<br>never breastfeeding<br>Compared<br>continued<br>breastfeeding with<br>non-continued<br>breastfeeding<br>Compares ≥ 6<br>months<br>breastfeeding with<br>never breastfeeding<br>Compares never<br>exclusive<br>breastfeeding with<br>breastfeeding 0–6<br>months, 6-<12<br>months and ≥ 12<br>months<br>Compares never<br>breastfeeding with <<br>2 months, 2–6<br>months, and ≥ 6<br>months<br>Compares never<br>breastfeeding with <<br>1 week, 1 week - 1 |  |
| 2012 | Al-Farsi <sup>[8]</sup> | Oman      | ASD<br>Controls              | 102<br>102 | 3-14 years                     | Standard<br>assessment<br>(CARS)                                                   | DSM-IV-TR | 1.48(1.01-3.1)<br>1.7(1.03-4.3)<br><i>P</i> for trend =<br>0.04<br><i>P</i> for trend =<br>0.001                                                                                                                                                                                                                                                                                                                                                                                                                                                                                                                                                                                                                                                                                                |  |
| 2012 | Bawono <sup>[9]</sup>   | Indonesia | ASD<br>Controls              | 52<br>104  | 3-10 years                     | Diagnostic<br>procedure<br>by an expert<br>child and<br>adolescent<br>psychiatrist | DSM-IV-TR | 2.01 (1.02-<br>3.96)<br>5.75 (1.4-<br>23.49)<br>2.17 (0.73-<br>6.46)<br>1.59 (0.54-<br>4.62)                                                                                                                                                                                                                                                                                                                                                                                                                                                                                                                                                                                                                                                                                                    |  |
| 2006 | Schultz <sup>[10]</sup> | USA       | ASD<br>Controls              | 861<br>123 | 7.8±3.9 years<br>7.4±4.5 years | Parent-<br>report                                                                  | NA        | 0.69 (0.32–<br>1.48), 0.51<br>(0.24–1.1),<br>and 0.4<br>(0.230.71)                                                                                                                                                                                                                                                                                                                                                                                                                                                                                                                                                                                                                                                                                                                              |  |
| 1989 | Tanoue <sup>[11]</sup>  | Japan     | Infantile autism<br>Controls | 145<br>224 | 3 years                        | Diagnostic<br>procedure<br>by an expert                                            | DSM-III   | 0.43 (0.16–<br>1.15), 0.24<br>(0.11-0.52),                                                                                                                                                                                                                                                                                                                                                                                                                                                                                                                                                                                                                                                                                                                                                      |  |

|                 |                      |                        |                      |                |                               |                                                             |                                                                     |                                                                                                                                      |                                                                                                                                                                          |                          |
|-----------------|----------------------|------------------------|----------------------|----------------|-------------------------------|-------------------------------------------------------------|---------------------------------------------------------------------|--------------------------------------------------------------------------------------------------------------------------------------|--------------------------------------------------------------------------------------------------------------------------------------------------------------------------|--------------------------|
| Cohort          |                      |                        |                      |                |                               | child and adolescent psychiatrist                           |                                                                     | month, 1–2 months, 2–3 months, 3–6 months, 6–12 months, and ≥ 12 months                                                              | 0.23 (0.10-0.51), and 0.27 (0.12-0.57)                                                                                                                                   |                          |
|                 | 1988                 | Burd <sup>[12]</sup>   | USA                  | PDD Controls   | 50<br>50                      | 9.0±4.6 years<br>8.8±4.7 years                              | Diagnostic procedure by an expert child and adolescent psychiatrist | DSM-III                                                                                                                              | NA                                                                                                                                                                       | Unreported               |
|                 | 2018                 | Lemcke <sup>[13]</sup> | Denmark.             | ASD ID Total   | 973<br>300<br>76,322          | Men age = 11 years                                          | NA                                                                  | ICD-10                                                                                                                               | Give up exclusive breastfeeding within the first 3 months<br>Continued breastfeeding after 6 months<br>Compares ever breastfeeding with never breastfeeding at discharge | HR=1.8-1.9<br>HR=0.7-0.8 |
|                 | 2011                 | Dodds <sup>[14]</sup>  | Canada               | ASD Normal     | 924<br>128,809                | 1-17 years                                                  | Administrative databases                                            | ICD-9 or ICD 10                                                                                                                      |                                                                                                                                                                          | 1.15 (1.01-1.31)         |
| Cross-sectional |                      |                        |                      |                |                               |                                                             |                                                                     |                                                                                                                                      |                                                                                                                                                                          |                          |
| 2021            | Kim <sup>[15]</sup>  | Korea                  | ASD Total            | 606<br>374,074 | 6 months till 10 years of age | Administrative databases                                    | ICD-10                                                              | Compared exclusive breastfeeding with formula feeding during the first 4 to 6 months                                                 | 0.72 (0.57-0.89)                                                                                                                                                         |                          |
| 2021            | Jing <sup>[16]</sup> | China                  | autistic trait Total | 2074<br>67,578 | 4.61±0.88 years               | Screening by Autism Behavior Checklist (ABC)                | Undiagnosed                                                         | Compared exclusive breastfeeding or mixed feeding with never breastfeeding                                                           | 0.773 (0.676–0.884)                                                                                                                                                      |                          |
| 2019            | Soke <sup>[17]</sup> | USA                    | ASD Controls         | 673<br>876     | 30-68 months                  | Screening and diagnostic procedure with standard assessment | DSM-IV                                                              | Compared breastfeeding initiation with never breastfeeding<br>Compared duration of breastfeeding in the high tertile(12 months) with | 0.88 (0.60-1.28)<br>0.61(0.45-0.84)<br>0.72 (0.54-0.98)                                                                                                                  |                          |

|      |                            |         |                                 |               |              | (ADOS, ADI-R)                                                                 |             | low(<6 months) or the middle(6-<12 months)                                                                                                                                                                                                                                                                                                                                                                                                                                                                                                                        |                                                                                                                                                                                        |
|------|----------------------------|---------|---------------------------------|---------------|--------------|-------------------------------------------------------------------------------|-------------|-------------------------------------------------------------------------------------------------------------------------------------------------------------------------------------------------------------------------------------------------------------------------------------------------------------------------------------------------------------------------------------------------------------------------------------------------------------------------------------------------------------------------------------------------------------------|----------------------------------------------------------------------------------------------------------------------------------------------------------------------------------------|
| 2017 | Boucher <sup>[18]</sup>    | Spanish | Autistic trait                  | 1,346         | 4-6.9 year   | Screening by the Spanish version of the Childhood Autism Spectrum Test (CAST) | Undiagnosed | Compared duration of any breastfeeding(months)<br>Compared duration of predominant breastfeeding(months)<br>Compared duration of exclusive breastfeeding (months)<br>Compared late initiation of breastfeeding and early initiation<br>Compared exclusive breastfeeding in the first 6 months with no<br>Any partial breastfeeding<br>Exclusive breastfeeding for 6 months<br>Each additional month of partial breastfeeding<br>Each additional month of exclusive breastfeeding<br>Compares benefits of ever breastfeeding, at 3 months, 6 months, and 12 months | 1.00(0.95,1.05)<br>0.98 (0.87,1.10)<br>1.02 (0.86-1.22)<br>3.9 (1.83-8.39)<br>0.2 (0.05-0.91)<br>0.68 (0.4-1.3)<br>0.74 (0.3-1.7)<br>1.03 (0.97-1.10)<br>1.04(.096-1.13)<br>Unreported |
| 2016 | Ravi <sup>[19]</sup>       | India   | High-risk ASD<br>Low/Medium ASD | 33<br>317     | 16-30 months | Screening by Modified Checklist of Autism in Toddlers, Revised(M-CHAT-R)      | Undiagnosed |                                                                                                                                                                                                                                                                                                                                                                                                                                                                                                                                                                   |                                                                                                                                                                                        |
| 2015 | Husk <sup>[20]</sup>       | USA     | ASD Controls                    | 391<br>37,901 | 2-5years     | Parent-report                                                                 | DSM-IV      |                                                                                                                                                                                                                                                                                                                                                                                                                                                                                                                                                                   |                                                                                                                                                                                        |
| 2011 | Shamberger <sup>[21]</sup> | USA     | ASD Controls                    | NA            | 3–21 years   | NA                                                                            | NA          |                                                                                                                                                                                                                                                                                                                                                                                                                                                                                                                                                                   |                                                                                                                                                                                        |

**Abbreviations:** ASD, autism spectrum disorder; DSM- 5, Diagnostic and Statistical Manual of Mental Disorders, Fifth Edition; DSM-IV-TR, the text revision of the fourth edition of the Diagnostic and Statistical Manual of Mental Disorders; DSM-IV, Diagnostic and Statistical Manual of Mental Disorders, Fourth Edition; DSM-III, Diagnostic and Statistical Manual of Mental Disorders, Third Edition; ICD-9, International Classification of

Diseases, Ninth Revision; ICD-10, International Classification of Diseases, 10th Revision;

**Table S2 Comparison of demographic characteristics of participants with or without the information of questionnaires**

| Characteristics*           | Children<br>without questionnaires<br>(N=1,879) | Children<br>with questionnaires<br>(N =6,049) | Overall<br>(N =7,928) | P value |
|----------------------------|-------------------------------------------------|-----------------------------------------------|-----------------------|---------|
|                            | No. (%) / Mean (SD)                             | No. (%) / Mean (SD)                           | No. (%) / Mean (SD)   |         |
| <b>Child age, months</b>   | 22.7 (3.8)                                      | 22.7 (4.1)                                    | 22.7 (4.0)            | .71     |
| <b>Child gender</b>        |                                                 |                                               |                       |         |
| Male                       | 1,027 (55.7%)                                   | 3,364 (55.6%)                                 | 4,391 (55.6%)         | .97     |
| Female                     | 818 (44.3%)                                     | 2,685 (44.4%)                                 | 3,503 (44.4%)         |         |
| <b>Only child</b>          |                                                 |                                               |                       |         |
| Yes                        | 514 (29.1%)                                     | 1,772 (29.3%)                                 | 2,286 (29.2%)         | .87     |
| No                         | 1,253 (70.9%)                                   | 4,277 (70.7%)                                 | 5,530 (70.8%)         |         |
| <b>Maternal education*</b> |                                                 |                                               |                       | .07     |
| Less than high school      | 441 (24.1%)                                     | 1,045 (17.3%)                                 | 1,486 (18.9%)         |         |
| Completed high school      | 962 (52.5%)                                     | 3,188 (52.7%)                                 | 4,150 (52.7%)         |         |
| College degree             | 315 (17.2%)                                     | 1,407 (23.3%)                                 | 1,722 (21.8%)         |         |
| Advanced degree            | 115 (6.3%)                                      | 409 (6.8%)                                    | 524 (6.6%)            |         |

**Abbreviations:** SD, Standard deviation

\*Among those who did not have a questionnaire, 34 were missing in gender, 112 were missing in only child and 148 were missing in mother's education level. The information was complete among those who had the questionnaire.

**Table S3 Demographic information and maternal risk factors during pregnancy between toddlers with and without ASD**

| Characteristic                                     | Mean (SD) /No. (%)             |                          |                        | P value         |
|----------------------------------------------------|--------------------------------|--------------------------|------------------------|-----------------|
|                                                    | Children without ASD (N=5,978) | Children with ASD (N=71) | Total sample (N=6,049) |                 |
| <b>Child age (month)</b>                           | 22.7±4.1                       | 24.3±3.6                 | 22.7±4.1               | <b>&lt; .01</b> |
| <b>Child gender</b>                                |                                |                          |                        |                 |
| Male                                               | 3,302(55.2)                    | 62(87.3)                 | 3,364(55.6)            | <b>&lt; .01</b> |
| Female                                             | 2,676(44.8)                    | 9(12.7)                  | 2,685(44.4)            |                 |
| <b>Only child</b>                                  |                                |                          |                        |                 |
| Yes                                                | 4,229(70.7)                    | 48(67.6)                 | 4,277(70.7)            | .56             |
| No                                                 | 1,749(29.3)                    | 23(32.4)                 | 1,772(29.3)            |                 |
| <b>Preterm birth</b>                               |                                |                          |                        |                 |
| Yes                                                | 503(8.4)                       | 4(5.6)                   | 507(8.4)               | .40             |
| No                                                 | 5,475(91.6)                    | 67(94.4)                 | 5,542(91.6)            |                 |
| <b>Maternal age</b>                                |                                |                          |                        |                 |
| ≤24 years                                          | 1,031 (17.2)                   | 14 (19.7)                | 1,045 (17.3)           | .94             |
| 25-29 years                                        | 3,151 (52.7)                   | 37 (52.1)                | 3,188 (52.7)           |                 |
| 30-34 years                                        | 1,391 (23.3)                   | 16 (22.5)                | 1,407 (23.3)           |                 |
| ≥35 years                                          | 405 (6.8)                      | 4 (5.6)                  | 409 (6.8)              |                 |
| <b>Maternal education level</b>                    |                                |                          |                        |                 |
| Primary school and below                           | 661 (11.1)                     | 16 (22.5)                | 677 (11.2)             | <b>&lt; .01</b> |
| Middle school                                      | 1,269 (21.2)                   | 20 (28.2)                | 1,289 (21.3)           |                 |
| College degree                                     | 3,737 (62.5)                   | 31 (43.7)                | 3,768 (62.3)           |                 |
| Advanced degree                                    | 311 (5.2)                      | 4 (5.6)                  | 315 (5.2)              |                 |
| <b>Yearly household income</b>                     |                                |                          |                        |                 |
| ≤¥100, 000                                         | 2,122 (35.5)                   | 31 (43.7)                | 2,153 (35.6)           | .35             |
| ¥100, 000-¥300, 000                                | 2,293 (38.4)                   | 21 (29.6)                | 2,314 (38.3)           |                 |
| ≥¥300, 000                                         | 457 (7.6)                      | 7 (9.9)                  | 464 (7.7)              |                 |
| Not reported                                       | 1,106 (18.5)                   | 12 (16.9)                | 1,118 (18.5)           |                 |
| <b>Ethnic background</b>                           |                                |                          |                        |                 |
| Han                                                | 5,605 (93.8)                   | 69 (97.2)                | 5,674 (93.8)           | .23             |
| Other                                              | 373 (6.2)                      | 2 (2.8)                  | 375 (6.2)              |                 |
| <b>Complications during pregnancy</b>              |                                |                          |                        |                 |
| Yes                                                | 849 (14.2)                     | 11 (15.5)                | 860 (14.2)             | .76             |
| No                                                 | 5,129 (85.8)                   | 60 (84.5)                | 5,189 (85.8)           |                 |
| <b>Depression during pregnancy</b>                 |                                |                          |                        |                 |
| Yes                                                | 1459 (24.4)                    | 27 (38.0)                | 1,486 (24.6)           | <b>&lt; .01</b> |
| No                                                 | 4,519 (75.6)                   | 44 (62.0)                | 4,563 (75.4)           |                 |
| <b>Second-hand smoke exposure during pregnancy</b> |                                |                          |                        |                 |
| Yes                                                | 825 (13.8)                     | 18 (25.4)                | 843 (13.9)             | <b>&lt;.01</b>  |
| No                                                 | 5,153 (86.2)                   | 53 (74.6)                | 5,206 (86.1)           |                 |
| <b>Pre-pregnancy overweight/obesity</b>            |                                |                          |                        |                 |
| Yes                                                | 465 (7.8)                      | 7 (9.9)                  | 472 (7.8)              | .52             |
| No                                                 | 5,513 (92.2)                   | 64 (90.1)                | 5,577 (92.2)           |                 |

Abbreviations: SD, Standard deviation



**Table S4 Comparison of breastfeeding status under the first six months among toddlers with and without ASD**

|                         | Total sample<br>(N=6049)<br>N (%) | Toddlers<br>without ASD<br>(N=5,978) N (%) | Toddlers<br>with ASD<br>(N=71) N (%) | <i>P</i> value |
|-------------------------|-----------------------------------|--------------------------------------------|--------------------------------------|----------------|
| Exclusive breastfeeding | 2,950 (48.8)                      | 2,929 (49.0)                               | 21(29.6)                             | <.01           |
| Partial breastfeeding   | 2,551 (42.2)                      | 2,514 (42.1)                               | 37(52.1)                             |                |
| Not breastfeeding       | 548 (9.1)                         | 535 (8.9)                                  | 13(18.3)                             |                |

**Table S5 Prevalence of ASD associated with breastfeeding during the first six months among toddlers**

|                                               | No.   | Toddlers with ASD |
|-----------------------------------------------|-------|-------------------|
|                                               |       | n (%)             |
| Total                                         | 6,049 | 71(1.2)           |
| Breastfeeding status for the first six months |       |                   |
| Exclusive breastfeeding                       | 2,950 | 21(0.7)           |
| Partial breastfeeding                         | 2,551 | 37(1.5)           |
| Not breastfeeding                             | 548   | 13(2.4)           |

**Table S6 The associations between breastfeeding status under the first six months by using Firth's Bias-Reduced Logistic Regression**

|                                               | Adjusted model          |                |
|-----------------------------------------------|-------------------------|----------------|
|                                               | OR (95%CI)              | <i>P</i> value |
| Breastfeeding status for the first six months |                         |                |
| Exclusive breastfeeding                       | 1[Reference]            |                |
| Partial breastfeeding                         | 1.53(0.90, 2.68)        | 0.12           |
| Not breastfeeding                             | <b>2.35(1.12, 4.75)</b> | <b>0.02</b>    |

The model was adjusted for child's age, gender, only child, maternal age, maternal education level, yearly household income, ethnic background, study area, preterm birth, pregnancy information (complications and depression during pregnancy), second-hand smoke exposure and overweight/obesity before pregnancy.

**Table S7 The associations between breastfeeding status under the first six months and ASD when restricting toddlers in full-term birth**

|                                               | Adjusted model          |                |
|-----------------------------------------------|-------------------------|----------------|
|                                               | OR (95%CI)              | <i>P</i> value |
| Breastfeeding status for the first six months |                         |                |
| Exclusive breastfeeding                       | 1[Reference]            |                |
| Partial breastfeeding                         | 1.52(0.87, 2.73)        | 0.15           |
| Not breastfeeding                             | <b>2.77(1.30, 5.73)</b> | <b>0.01</b>    |

The model was adjusted for child's age, gender, only child, maternal age, maternal education level, yearly household income, ethnic background, study area, pregnancy information (complications and depression during pregnancy), second-hand smoke exposure and overweight/obesity before pregnancy.

**Table S8 The associations between breastfeeding status under the first six months and ASD when restricting mothers of toddlers without complications during pregnancy**

|                                               | Adjusted model          |                |
|-----------------------------------------------|-------------------------|----------------|
|                                               | OR (95%CI)              | <i>P</i> value |
| Breastfeeding status for the first six months |                         |                |
| Exclusive breastfeeding                       | 1[Reference]            |                |
| Partial breastfeeding                         | 1.66(0.92, 3.11)        | 0.10           |
| Not breastfeeding                             | <b>2.61(1.18, 5.64)</b> | <b>0.02</b>    |

The model was adjusted for child's age, gender, only child, maternal age, maternal education level, yearly household income, ethnic background, study area, preterm birth, second-hand smoke exposure and overweight/obesity before pregnancy.

**Table S9 The associations between breastfeeding status under the first six months and ASD when restricting mothers of toddlers without overweight or obesity before pregnancy.**

|                                               | Adjusted model          |             |
|-----------------------------------------------|-------------------------|-------------|
|                                               | OR (95%CI)              | P value     |
| Breastfeeding status for the first six months |                         |             |
| Exclusive breastfeeding                       | 1[Reference]            |             |
| Partial breastfeeding                         | 1.64(0.92, 3.03)        | 0.10        |
| Not breastfeeding                             | <b>2.67(1.23, 5.68)</b> | <b>0.01</b> |

The model was adjusted for child’s age, gender, only child, maternal age, maternal education level, yearly household income, ethnic background, study area, preterm birth, pregnancy information (complications and depression during pregnancy), second-hand smoke exposure.

## Reference

1. Bittker, S.S.; Bell, K.R. Acetaminophen, antibiotics, ear infection, breastfeeding, vitamin D drops, and autism: an epidemiological study. *Neuropsychiatr Dis Treat* **2018**, *14*, 1399-1414, doi:10.2147/NDT.S158811.
2. Manohar, H., Pravallika, M., Kandasamy, P., Chandrasekaran, V., & Rajkumar, R. P. . Role of Exclusive Breastfeeding in Conferring Protection in Children At-Risk for Autism Spectrum Disorder: Results from a Sibling Case-control Study. *Journal of neurosciences in rural practice* **2018**, *9*, 132-136, doi: [https://doi.org/10.4103/jnnp.jnnp\\_331\\_17](https://doi.org/10.4103/jnnp.jnnp_331_17).
3. Say, G.N.; Karabekiroglu, K.; Babadagi, Z.; Yuce, M. Maternal stress and perinatal features in autism and attention deficit/hyperactivity disorder. *Pediatr Int* **2016**, *58*, 265-269, doi:10.1111/ped.12822.
4. Field, S.S. Interaction of genes and nutritional factors in the etiology of autism and attention deficit/hyperactivity disorders: a case control study. *Med Hypotheses* **2014**, *82*, 654-661, doi:10.1016/j.mehy.2014.02.021.
5. George, B.; Padmam, M.S.; Nair, M.K.; Leena, M.L.; Russell, P.S. CDC Kerala 14: Early child care practices at home among children (2-6 y) with autism--a case control study. *Indian J Pediatr* **2014**, *81 Suppl 2*, S138-141, doi:10.1007/s12098-014-1602-5.
6. Brown, C.M.; Austin, D.W.; Busija, L. Observable essential fatty acid deficiency markers and autism spectrum disorder. *Breastfeed Rev* **2014**, *22*, 21-26.
7. Shafai, T.; Mustafa, M.; Hild, T.; Mulari, J.; Curtis, A. The association of early weaning and formula feeding with autism spectrum disorders. *Breastfeed Med* **2014**, *9*, 275-276, doi:10.1089/bfm.2013.0104.
8. Al-Farsi, Y.M.; Al-Sharbati, M.M.; Waly, M.I.; Al-Farsi, O.A.; Al-Shafae, M.A.; Al-Khaduri, M.M.; Trivedi, M.S.; Deth, R.C. Effect of suboptimal breast-feeding on occurrence of autism: a case-control study. *Nutrition* **2012**, *28*, e27-32, doi:10.1016/j.nut.2012.01.007.
9. Bawono, K.D.H., E.S.; Wandita S. Breastfeeding as a protective factor against autism. *JURNAL GIZI KLINIK INDONESIA* **2012**, *8*, 166-171.
10. Schultz, S.T.; Klonoff-Cohen, H.S.; Wingard, D.L.; Akshoomoff, N.A.; Macera, C.A.; Ji, M.; Bacher, C. Breastfeeding, infant formula supplementation, and Autistic Disorder: the results of a parent survey. *Int Breastfeed J* **2006**, *1*, 16, doi:10.1186/1746-4358-1-16.
11. Tanoue, Y.; Oda, S. Weaning time of children with infantile autism. *J Autism Dev Disord* **1989**, *19*, 425-434, doi:10.1007/BF02212940.
12. Burd, L.; Fisher, W.; Kerbeshian, J.; Vesely, B.; Durgin, B.; Reep, P. A comparison of breastfeeding rates among children with pervasive developmental disorder, and controls. *J Dev Behav Pediatr* **1988**, *9*, 247-251.
13. Lemcke, S.; Parner, E.T.; Bjerrum, M.; Thomsen, P.H.; Lauritsen, M.B. Early Regulation in Children Who Are Later Diagnosed with Autism Spectrum Disorder. A Longitudinal Study within the Danish National Birth Cohort. *Infant Ment Health J* **2018**, *39*, 170-182, doi:10.1002/imhj.21701.
14. Dodds, L.; Fell, D.B.; Shea, S.; Armson, B.A.; Allen, A.C.; Bryson, S. The role of prenatal, obstetric and neonatal factors in the development of autism. *J Autism Dev Disord* **2011**, *41*, 891-902, doi:10.1007/s10803-010-1114-8.
15. Kim, J.H.; Lee, S.W.; Lee, J.E.; Ha, E.K.; Han, M.Y.; Lee, E. Breastmilk Feeding during the First 4 to 6 Months of Age and Childhood Disease Burden until 10 Years of Age. *Nutrients* **2021**, *13*, doi:10.3390/nu13082825.
16. Chen, J.; Strodl, E.; Huang, L.H.; Chen, J.Y.; Liu, X.C.; Yang, J.H.; Chen, W.Q. Associations between Prenatal Education, Breastfeeding and Autistic-Like Behaviors in Pre-Schoolers. *Children (Basel)* **2021**, *8*, doi:10.3390/children8020124.
17. Soke, G.N.; Maenner, M.; Windham, G.; Moody, E.; Kaczaniuk, J.; DiGuseppi, C.; Schieve, L.A. Association Between Breastfeeding Initiation and Duration and Autism Spectrum Disorder in Preschool Children Enrolled in the Study to Explore Early Development. *Autism Res* **2019**, *12*, 816-829, doi:10.1002/aur.2091.
18. Boucher, O.; Julvez, J.; Guxens, M.; Arranz, E.; Ibarluzea, J.; Sanchez de Miguel, M.; Fernandez-Somoano, A.; Tardon, A.; Rebagliato, M.; Garcia-Esteban, R.; et al. Association between breastfeeding duration and cognitive development, autistic traits and ADHD symptoms: a multicenter study in Spain. *Pediatr Res* **2017**, *81*, 434-442, doi:10.1038/pr.2016.238.
19. Ravi, S.; Chandrasekaran, V.; Kattimani, S.; Subramanian, M. Maternal and birth risk factors for children screening positive for autism spectrum disorders on M-CHAT-R. *Asian J Psychiatr* **2016**, *22*, 17-21, doi:10.1016/j.ajp.2016.04.001.
20. Husk, J.S.; Keim, S.A. Breastfeeding and Autism Spectrum Disorder in the National Survey of Children's Health.

*Epidemiology* **2015**, *26*, 451-457, doi:10.1097/EDE.0000000000000290.

21. Shamberger, R.J. Autism rates associated with nutrition and the WIC program. *J Am Coll Nutr* **2011**, *30*, 348-353, doi:10.1080/07315724.2011.10719978.
